# Supplementary material for: Endocannabinoid 2-arachidonoylglycerol is elevated in the coronary circulation during acute coronary syndrome
Source: PLoS One. 2019 Dec 30;14(12):e0227142. doi: 10.1371/journal.pone.0227142 (PMC6936850; doi:10.1371/journal.pone.0227142)
Supplement: S1 Table — P-values as indicated. 2-AG, 2-arachidonoylglycerol; AA, arachidonic acid; AEA, N-arachidonoylethanolamide; BMI, body mass index; CK-MB, creatine kinase-muscle/brain; CRP, c-reactive protein; Hb, hemoglobin; HDL, high-density lipoprotein; IL, interleukin; LDL, low-density lipoproetin; PCT, procalcitonin; PEA, palmitoylethanolamide. (DOCX) [file pone.0227142.s003.docx]

**Endocannabinoid 2-arachidonoylglycerol is elevated in the coronary circulation during acute coronary syndrome**

Julian Jehle1*, Hanna Goerich1, Laura Bindila2, Beat Lutz2, Georg Nickenig1 and Vedat Tiyerili1

1. Department of Internal Medicine II Cardiology, Pneumology, Angiology, University Hospital Bonn, Bonn, Germany
2. Institute of Physiological Chemistry, University Medical Center of the Johannes Gutenberg University Mainz, Mainz, Germany

**Supporting Information**

**S1 Table. Pearson’s correlation coefficients (r) of endocannabinoid levels (sheath) with clinical parameters and laboratory findings.**

| **Correlation with** | **2-AG** | **AEA** | **PEA** | **AA** |
| --- | --- | --- | --- | --- |
| Age | r = 0.0259  p = 0.8256 | r = 0.1164  p = 0.3235 | r = 0.0372  p = 0.7653 | r = -0.0208  p = 0.8862 |
| Weight | r = -0.0803  p = 0.5527 | r = 0.2508  p = 0.0647 | r = -0.0337  p = 0.8182 | r = 0.2395  p = 0.0939 |
| Height | r = 0.0683  p = 0.6236 | r = -0.2616  p = 0.0610 | r = -0.1377  p = 0.3559 | r = -0.1442  p = 0.3282 |
| BMI | r = -0.1158  p = 0.4045 | ***r = 0.3703***  ***p = 0.0069*** | r = 0.0460  p = 0.7588 | ***r = 0.3215***  ***p = 0.0259*** |
| Systolic blood pressure | r = -0.1020  p = 0.3841 | r = -0.0165  p = 0.8893 | r = -0.0326  p = 0.7937 | r = -0.0703  p = 0.5687 |
| Diastolic blood pressure | r = 0.0550  p = 0.6394 | ***r = 0.2502***  ***p = 0.0315*** | r = 0.1719  p = 0.1641 | r = 0.0750  p = 0.5434 |
| Heart rate | r = -0.0257  p = 0.8281 | ***r = 0.2553***  ***p = 0.0293*** | ***r = 0.3478***  ***p = 0.0042*** | r = 0.0730  p = 0.5571 |
| Erythrocytes | r = -0.1083  p = 0.3550 | ***r = 0.3045***  ***p = 0.0083*** | r = 0.1926  p = 0.1184 | ***r = 0.2524***  ***p = 0.0379*** |
| Hb | r = -0.1639  p = 0.1600 | ***r = 0.2765***  ***p = 0.0171*** | ***r = 0.2660***  ***p = 0.0296*** | ***r = 0.2596***  ***p = 0.0325*** |
| Hematocrit | r = -0.1592  p = 0.1726 | ***r = 0.3086***  ***p = 0.0075*** | ***r = 0.2867***  ***p = 0.0186*** | r = 0.2271  p = 0.0625 |
| Thrombocytes | r = -0.0218  p = 0.8526 | r = 0.0116  p = 0.9216 | r = -0.1227  p = 0.3224 | r = 0.0707  p = 0.5667 |
| Leukocytes | r = 0.0325  p = 0.7819 | r = -0.0968  p = 0.4122 | r = -0.1090  p = 0.3798 | r = 0.1127  p = 0.3600 |
| Lymphocytes | r = 0.0384  p = 0.7613 | r = -0.1265  p = 0.3191 | r = -0.1859  p = 0.1586 | r = 0.1725  p = 0.1914 |
| Monocytes | r = - 0.0020  p = 0.9876 | r = -0.0320  p = 0.8021 | r = 0.1631  p = 0.2170 | r = 0.0271  p = 0.8387 |
| Neutrophil Granulocytes | r = -0.0653  p = 0.6055 | r = 0.0180  p = 0.8878 | r = 0.0231  p = 0.8623 | r = 0.0343  p = 0.7967 |
| Eosinophil Granulocytes | r = 0.0255  p = 0.8413 | r = -0.1202  p = 0.3482 | r = -0.1207  p = 0.3670 | r = -0.1461  p = 0.2739 |
| Basophil Granulocytes | r = -0.0417  p = 0.7418 | r = -0.0632  p = 0.6199 | r = -0.0061  p = 0.9637 | r = -0.0307  p = 0.8174 |
| CRP | r = 0.0387  p = 0.7538 | r = 0.0604  p = 0.6272 | r = 0.0038  p = 0.9769 | r = -0.2258  p = 0.0802 |
| PCT | r = 0.0214  p = 0.8758 | r = 0.1365  p = 0.3158 | r =0.0224  p = 0.8722 | r = -0.1367  p = 0.3196 |
| IL-6 | ***r = 0.4235***  ***p = 0.0013*** | r = -0.1066  p = 0.4387 | r = 0.0957  p = 0.4911 | r = -0.0865  p = 0.5300 |
| IL-8 | r = -0.1165  p = 0.4060 | r = -0.1140  p = 0.4117 | r = -0.1702  p = 0.2232 | r = -0.0447  p = 0.7482 |
| Complement 3 | r = -0.0670  p = 0.6271 | r = 0.1627  p = 0.2354 | r = -0.1366  p = 0.3247 | r = 0.1582  p = 0.2488 |
| Complement 4 | r = -0.1499  p = 0.2747 | r = 0.1592  p = 0.2457 | r = -0.1309  p = 0.3455 | r = -0.0084  p = 0.9516 |
| HbA1c | r = -0.0854  p = 0.5025 | r = 0.0815  p = 0.5255 | r = -0.0099  p = 0.9406 | r = -0.0347  p = 0.7926 |
| Peak troponin | ***r = 0.4564***  ***p < 0.0001*** | r = 0.1100  p = 0.3507 | r = 0.0350  p = 0.7788 | r = 0.2242  p = 0.0661 |
| Peak CK-MB | r = 0.1049  p = 0.3703 | r = 0.0594  p = 0.6150 | r = 0.2189  p = 0.0751 | r = 0.0414  p = 0.7377 |
| Total cholesterol | r = 0.0050  p =0.6981 | r = 0.1626  p = 0.2029 | ***r = 0.2556***  ***p = 0.0468*** | r = 0.2204  p = 0.0878 |
| LDL | r = 0.0614  p = 0.6056 | r = 0.1848  p = 0.1175 | ***r = 0.2990***  ***p = 0.0147*** | r = 0.1226  p = 0.3269 |
| HDL | r = -0.1347  p = 0.2558 | r = -0.0876  p = 0.4612 | r = 0.1120  p = 0.3706 | r = 0.0667  p = 0.5948 |
| Triglycerides | r = 0.1073  p = 0.3730 | r = 0.0115  p = 0.9243 | r = -0.0663  p = 0.6028 | r = 0.0793  p = 0.5333 |

P-values as indicated. 2-AG, 2-arachidonoylglycerol; AA, arachidonic acid; AEA, *N*-arachidonoylethanolamide; BMI, body mass index; CK-MB, creatine kinase-muscle/brain; CRP, c-reactive protein; Hb, hemoglobin; HDL, high-density lipoprotein; IL, interleukin; LDL, low-density lipoproetin; PCT, procalcitonin; PEA, palmitoylethanolamide.
